# Supplementary material for: Human transporter de-oligomerization regulates copper uptake into cells
Source: Research Square preprint supplement (doi:10.21203/rs.3.rs-5456520/v1), 2024-12-09
Supplement: Supplementary file 1 [file 99d6921679eafa15a291673a.docx]

# **Supplementary Table 1. Key resources**

| REAGENT or RESOURCE | SOURCE | IDENTIFIER |
| --- | --- | --- |
| ***Antibodies*** | | |
| Monoclonal rabbit anti-Rab5 (C8B1) antibody | Cell Signaling Technology | Cat# 3547; RRID:AB_2300649 |
| Polyclonal rabbit anti-FLAG antibody | Rockland | Cat# 600-401-383; RRID:AB_219374 |
| Monoclonal mouse ANTI-FLAG M2 antibody | Sigma-Aldrich | Cat# F1804; RRID:AB_262044 |
| Monoclonal rabbit anti-SLC31A1 / CTR1 antibody [EPR7936] | Abcam | Cat# ab129067; RRID:AB_11150613 |
| Monoclonal mouse anti-Na+/K+-ATPase alpha1 (C464.6) antibody | Santa Cruz Biotechnology | Cat# sc-21712; RRID:AB_626713 |
| Monoclonal mouse anti-β-Actin Antibody | Sigma-Aldrich | Cat# A5441; RRID:AB_476744 |
| Peroxidase-AffiniPure goat anti-Mouse IgG (H+L) | Jackson ImmunoResearch Labs | Cat# 115-035-062; RRID:AB_2338504 |
| Peroxidase-AffiniPure goat anti-Rabbit IgG (H+L) | Jackson ImmunoResearch Labs | Cat# 111-035-045; RRID:AB_2337938 |
| Goat anti-Rabbit IgG (H+L) Highly Cross-Adsorbed Secondary Antibody, Alexa Fluor™ 633 | Thermo Fisher Scientific | Cat# A-21071; RRID:AB_2535732 |
|  | | |
| ***Bacterial and virus strains*** | | |
| NEB® 5-alpha Competent E. coli (High Efficiency) | New England Biolabs | Cat# C2987H |
|  | | |
| ***Chemicals, peptides, and recombinant proteins*** | | |
| BamHI-HF® | New England Biolabs | R3136S |
| Bathocuproinedisulfonic acid disodium salt | Sigma-Aldrich | B1125 |
| Bovine serum albumin | Sigma-Aldrich | A7906 |
| Copper(II) chloride dihydrate | Sigma-Aldrich | C3279 |
| Cycloheximide | Sigma-Aldrich | C1988 |
| DMEM, high glucose | Gibco | 11965126 |
| DMEM, high glucose, no glutamine, no phenol red | Gibco | 31053028 |
| Dulbecco's Phosphate-Buffered Saline (DPBS) w/out Ca Mg | Corning | 21-031-CM |
| EcoRI-HF® | New England Biolabs | R3101S |
| EZ-Link™ sulfo-NHS-SS-biotin | Thermo Scientific | 21331 |
| Fetal bovine serum | SAFC | 12306C |
| Aqueous Glutaraldehyde EM Grade 70% | Electron Microscopy Sciences | 16365 |
| GlutaMAX™ Supplement | Gibco | 35050061 |
| Halt™ Protease Inhibitor Cocktail, EDTA-Free (100X) | Thermo Scientific | 78425 |
| HBSS, no calcium, no magnesium, no phenol red | Gibco | 14175095 |
| ImmobilonTM Western Chemiluminescent HRP Substrate | MilliporeSigma | WBKLS0500 |
| Lipofectamine™ 2000 Transfection Reagent | Invitrogen | 11668019 |
| Nitric acid 67 - 70%, ARISTAR® PLUS for trace metal analysis | VWR | 87003-259 |
| Normal goat serum | Gibco | 16210064 |
| NotI-HF® | New England Biolabs | R3189S |
| Opti-MEM™ I Reduced Serum Medium, no phenol red | Gibco | 11058021 |
| Paraformaldehyde 16% Aqueous Solution EM Grade | Electron Microscopy Sciences | 15710 |
| PBS, Phosphate Buffered Saline, 10X Solution | Fisher Scientific | BP3991 |
| Pierce™ NeutrAvidin™ agarose beads | Thermo Scientific | 29200 |
| Poly-L-lysine hydrobromide, mol wt 30,000-70,000 | Sigma-Aldrich | P2636 |
| Q5® High-Fidelity DNA Polymerase | New England Biolabs | M0491S |
| Sodium dodecyl sulfate | Sigma-Aldrich | L3771 |
| Sodium Pyruvate (100 mM) | Gibco | 11360070 |
| Triton™ X-100 | Sigma-Aldrich | T9284 |
| TrypLE™ Express Enzyme (1X), no phenol red | Gibco | 12604013 |
| Wheat Germ Agglutinin, Alexa Fluor™ 555Conjugate | Invitrogen | W32464 |
| Wheat Germ Agglutinin, Alexa Fluor™ 647Conjugate | Invitrogen | W32466 |
|  | | |
| ***Critical commercial assays*** | | |
| Mem-PER™ Plus Membrane Protein Extraction Kit | Thermo Scientific | Cat# 89842 |
| NEBuilder® HiFi DNA Assembly Cloning Kit | New England Biolabs | Cat# E5520S |
| Pierce™ BCA Protein Assay Kits | Thermo Scientific | Cat# 23227 |
| Q5® Site-Directed Mutagenesis Kit | New England Biolabs | Cat# E0554S |
|  | | |
| ***Deposited data*** | | |
| *Salmo salar* Ctr1 monomeric structure (copper-free) | Ren et al.7 | PDB: 6M97 |
| *Salmo salar* Ctr1 monomeric structure (copper-bound) | Ren et al.7 | PDB: 6M98 |
|  | | |
| ***Experimental models: Cell lines*** | | |
| Green monkey: COS-7 | ATCC | Cat# CRL-1651; RRID:CVCL_0224 |
| Human: HEK293 | ATCC | Cat# CRL-1573; RRID:CVCL_0045 |
|  | | |
| ***Oligonucleotides*** | | |
| #1_cloning mEos4b-Flag to CTR1_Forward: GGAAGAAGGCAGTGGTAGTGGATggatccatggtgagtgcgattaagccagacatgagga | This paper | N/A |
| #2_cloning mEos4b-Flag to CTR1_Reverse:  tctggattgcctgacaatgccagacgaATCCTGGATTACAAGGATGACGACG | This paper | N/A |
| #3_CTR1(185-190) tail restoration_ssOligo:  TACAAGGATGACGACGATAAGGTTTcggatATCACAGAGCATTGCCATtgAAACGGCCGGCCGCGGTCATAGCTGTTTCC | This paper | N/A |
| #4_CTR1(M150L) mutagenesis_Forward:  CTTCATGACCTACAACGGGTACCTC | This paper | N/A |
| #5_CTR1(M150L) mutagenesis_Reverse:  GGTCATAAGCTACTTCCTC**t**TGCTCAT | This paper | N/A |
| #6_mEos4b-Flag for cloning TacmE_Forward:  cgGAATTCATGGTGAGTGCGATTAAGCC | This paper | N/A |
| #7_mEos4b-Flag for cloning TacmE_Reverse:  CgGGATCCTTACTTGTCATCGTCATCCTTG | This paper | N/A |
| #8_mEos4b for cloning Tac2mE_Forward:  aaggaaaaaaGCGGCCGCtaATGGTGAGTGCGATTAAGCCAG | This paper | N/A |
| #9_mEos4b for cloning Tac2mE_Reverse:  cGAATTCACTACCTCGTCTGGCATTGTCAGG | This paper | N/A |
|  | | |
| ***Recombinant DNA*** | | |
| SLC31A1 (NM_001859) Human Tagged ORF Clone | OriGene | CAT# RC201980 |
| mEos4b-C1 | Addgene | RRID:Addgene_54812 |
| pCMV6_CTR1mE | This paper | N/A |
| pCMV6_CTR1(M150L)mE | This paper | N/A |
| pcDNA3.1_Tac | Tai et al.38,39 | N/A |
| pcDNA3.1_TacmE | This paper | N/A |
| pcDNA3.1_Tac2mE | This paper | N/A |
|  | | |
| ***Software and algorithms*** | | |
| SWISS‐MODEL | Guex and Peitsch40 |  |
| The PyMOL Molecular Graphics System, Version x.x | Schrödinger, LLC | https://www.pymol.org/ |
| Modeller | Webb and Sali41 |  |
| Chiron | Dokholyan et al.42 |  |
| Eris | Dokholyan et al.17 |  |
| Charmm-GUI | Im et al.43 |  |
| Amber 18 | Walker et al.44 |  |
| smND analysis | This paper |  |
| MATLAB | MathWorks, Inc. | https://www.mathworks.com/products/matlab.html |
| ImageLab SoftwareTM version 6.0 | Bio-Rad Laboratories, Inc. | https://www.bio-rad.com/en-us/product/image-lab-software?ID=KRE6P5E8Z |
| ImageJ | Schneider et al.45 | https://imagej.nih.gov/ij/ |
| GraphPad Prism 9 | GraphPad Software,  San Diego, California USA | https://www.graphpad.com/ |
|  | | |
| **Imaging components** | | |
| 405 nm LX 100mW Laser | Coherent, Inc. | Cat# OBIS 1284371 |
| 488 nm LX 150mW Laser | Coherent, Inc. | Cat# OBIS 1220123 |
| 552 nm LS 150mW Laser | Coherent, Inc. | Cat# OBIS 1284009 |
| 640 nm LX 100mW Laser | Coherent, Inc. | Cat# OBIS 1178790 |
| Scientific CMOS Camera | Teledyne Photometrics, Inc. | Cat# Prime 95B |
| Inverted Microscope | Olympus, Corp. | Cat# IX83 |
| Translational stage | Thorlabs Inc. | Cat# LST300 |
| W-VIEW GEMINI Image Splitting Optics | HAMAMATSU, Corp. | Cat# A12801-01 |
| 610 nm single bandpass and single edge filter | Chroma Tech. Corp. | Cat# ET610/60m |
| 680 nm single bandpass and single edge filter | Chroma Tech. Corp. | Cat# OSF-680/42 |
| 532 nm Laser Band splitter | Chroma Tech. Corp. | Cat# ZT532rdc-UF2 |
| 488 nm Laser Band splitter | Chroma Tech. Corp. | Cat# ZT488-UF2 |
| 458 nm Laser Band splitter | Chroma Tech. Corp. | Cat# ZT458-UF1 |
|  | | |
| ***Other*** | | |
| Marienfeld Superior™ Precision Cover Glass Thickness No. 1.5H (tol. ± 5 μm), 24 x 50 mm | Electron Microscopy Sciences | Cat# 71861-054-C |
| 4–20% Mini-PROTEAN® TGX Stain-Free™ Protein Gels, 10 well, 50 µl | Bio-Rad | Cat# 4568094 |
| Trans-Blot Turbo Mini 0.2 µm PVDF Transfer PacksTrans-Blot Turbo Mini 0.2 µm PVDF Transfer Packs | Bio-Rad | Cat# 1704156 |
|  | | |

**Supplementary Table 2. Comparison of smND under various kinetic models for estimating protein oligomeric states**

| **Ground Truth** | | | | | | |
| --- | --- | --- | --- | --- | --- | --- |
| **Scenario** | **%M** | **%D** | **%T** |  | | |
| **Com-1** | 10 | 20 | 70 | 2.6 | | |
| **Com-2** | 20 | 40 | 40 | 2.2 | | |
| **Com-3** | 30 | 0 | 70 | 2.4 | | |
| **Com-4** | 60 | 0 | 40 | 1.8 | | |
|  | | | | | | |
| **smND: no kinetic model** | | | | | | |
| **Scenario** | **%M ± sem** | **%D ± sem** | **%T ± sem** |  | **Δ%T*** | Δ****** |
| **Com-1** | 8 ± 1 | 27 ± 3 | 64 ± 2 | 2.54 | -6 | -0.06 |
| **Com-2** | 18 ± 1 | 49 ± 3 | 34 ± 2 | 2.18 | -6 | -0.02 |
| **Com-3** | 22 ± 1 | 22 ± 2 | 56 ± 2 | 2.34 | -14 | -0.06 |
| **Com-4** | 52 ± 1 | 23 ± 2 | 25 ± 2 | 1.73 | -15 | -0.07 |
|  | | | | | | |
| **smND: Model 1 (T🡪M+D)** | | | | | | |
| **Scenario** | **%M ± sem** | **%D ± sem** | **%T ± sem** |  | **Δ%T*** | Δ****** |
| **Com-1** | 11 ± 1 | 21 ± 2 | 69 ± 3 | 2.60 | -1 | 0 |
| **Com-2** | 20 ± 1 | 39 ± 2 | 42 ± 3 | 2.24 | 2 | 0.04 |
| **Com-3** | 17 ± 1 | 33 ± 2 | 51 ± 3 | 2.36 | -19 | -0.04 |
| **Com-4** | 32 ± 1 | 63 ± 2 | 6 ± 3 | 1.76 | -34 | -0.04 |
|  | | | | | | |
| **smND: Model 2 (T🡪3M)** | | | | | | |
| **Scenario** | **%M ± sem** | **%D ± sem** | **%T ± sem** |  | **Δ%T*** | Δ****** |
| **Com-1** | 15 ± 2 | 0 | 85 ± 2 | 2.70 | +15 | +0.10 |
| **Com-2** | 35 ± 2 | 0 | 65 ± 2 | 2.30 | +25 | +0.10 |
| **Com-3** | 30 ± 2 | 0 | 70 ± 2 | 2.40 | 0 | 0 |
| **Com-4** | 63 ± 2 | 0 | 38 ± 3 | 1.75 | -2.5 | -0.05 |
|  | | | | | | |
| * Δ%T = %T(fit) - %T(ground truth)  ** Δ = (fit) - (ground truth) | | | | | | |

**Supplementary Table 3. Statistical tests for data presented in all figures**

| **Figure panel** | **Sample** | **Statistic method** |
| --- | --- | --- |
| Figure 2C | *WT-Basal*: 5076 Rab5+ ROI from 6 cells  *WT-Cu*: 5583 Rab5+ ROI from 6 cells  *M150L-Basal*: 5251 Rab5+ ROI from 6 cells  *M150L-Cu*: 7230 Rab5+ ROI from 9 cells | Collected from two to three independent experiments. Data represents mean ± SEM. |
| Figure 3A-E | *WT-Basal*: 177,300 CTR1 spots from 564 Rab5+ ROI from 6 cells  *WT-Cu*: 93,819 CTR1 spots from 588 Rab5+ ROI from 6 cells | Collected from two to three independent experiments. *p* value was calculated with unpaired *t*-test. *p<0.05 |
| Figure 3F-J | *M150L-Basal*: 257,597 CTR1 spots from 794 Rab5+ ROI from 6 cells  *M150L-Cu*: 286,478 CTR1 spots from 830 Rab5+ ROI from 9 cells | Collected from two to three independent experiments. *p* value was calculated with unpaired *t*-test. ns, not significant. |
| Figure 4A & B | *Negative control***:** 26 cells  *Basal***:** 41 cells  *Cu***:** 43 cells | Data represents mean ± SEM of cells collected from three independent experiments. *p* value was calculated with one-way ANOVA with Bonferroni’s *post-hoc* test; ns, not significant. |
| Figure 4C & D | *WT-Basal*: 26 cells  *WT-Cu*: 31 cells  *M150L-Basal*: 29 cells  *M150L-Cu*: 38 cells | Data represents mean ± SEM of cells collected from three to four independent experiments. *p* value was calculated with one-way ANOVA with Dunn’s *post-hoc* test; ns, not significant. |
| Figure 4E | *WT-Basal*: 564 Rab5+ ROI from 6 cells  *WT-Cu*: 588 Rab5+ ROI from 6 cells  *M150L-Basal*: 794 Rab5+ ROI from 6 cells  *M150L-Cu*: 830 Rab5+ ROI from 9 cells | Collected from two to three independent experiments.  *p* value was calculated with unpaired *t*-test within the same expression group, ***p<0.0001; ns, not significant. |
| Figure 4F | *WT-Basal*: 490 Rab5- ROI from 6 cells  *WT-Cu*: 553 Rab5- ROI from 6 cells  *M150L-Basal*: 556 Rab5- ROI from 6 cells  *M150L-Cu*: 737 Rab5- ROI from 9 cells | Collected from two to three independent experiments.  *p* value was calculated with unpaired *t*-test within the same expression group, ***p<0.0001; ns, not significant. |
| Figure S1B | mEos4b-Flag;  CTR1mE;  CTR1(M150L)mE | N = 3 independent experiments. Two-way ANOVA, p<0.001 |

| Figure S4B & C | (WB) TacmE and Tac2mE | N = 3 independent experiments. |
| --- | --- | --- |
| Figure S4B & C | (smND)  *TacmE*: 421,815 mE spots from 868 Rab5+ ROI from 3 cells  *Tac2mE*: 560,008 mE spots from 625 Rab5+ ROI from 3 cells | Collected from two independent experiments. *p* value was calculated with unpaired *t*-test within the same expression group. ns, not significant. |
| Figure S4D & E | *TacmE-Basal*: 421,815 mE spots from 868 Rab5+ ROI from 3 cells  *TacmE-Cu*: 339,594 mE spots from 529 Rab5+ ROI from 3 cells | Collected from two independent experiments. *p* value was calculated with unpaired *t*-test within the same expression group. ns, not significant. |

# **Supplementary Methods**

**Single-molecule neighbor density (smND) assay**

The neighbor density (smND) assay is a technique designed to quantify the oligomeric states of proteins within cells, leveraging the concept that proteins in different oligomeric states exhibit distinct spatial distributions. This method utilizes the Probability of Neighbor Density (*PND*) theoretical model to analyze protein localization at a super-resolution level and reveal the protein oligomeric states from the neighbor density distributions.

***Basic principles of smND***

Single-molecule localization microscopy (SMLM), a technique that surpasses the traditional diffraction limit of light microscopy, pinpoints protein subunits with ~10 nm resolution. smND utilizes SMLM to extract protein oligomeric states *in situ* (Fig. 2e). For each detected protein location, a region of interest (ROI) was defined based on the localization precision of the technique, resulting in a 40 nm diameter circle. This ROI facilitates the calculation of neighbor density (*ND*), a measure of the number of protein subunits within the ROI. These *ND* values are then compiled to create an experimental Probability of Neighbor Density (*PND*exp) distribution, a normalized probability curve that illustrates the likelihood of encountering specific densities of neighboring subunits within the established ROIs.

Although it is straightforward to see that proteins with different oligomeric states will produce distinct *PND* distributions, several important factors need to be carefully integrated to elucidate the oligomeric states of proteins. We previously developed a theoretical model to explain how the protein oligomeric state can be associated with the *PND* distribution. [S1] Crucial to the extraction of oligomeric states from the *PND*exp assay are several key factors, including the photo-activation efficiency (*PE*) of the fluorophores and the protein concentration within cells. *PE* gauges the likelihood of fluorescent markers on proteins being activated, a critical factor that influences the detection and analysis of protein densities. Additionally, the concentration of proteins within the cell impacts the *ND*, affecting the analysis due to potential overcrowding or sparse distributions. Fortunately, the *PE* and protein concentration can be robustly determined through careful experimental design. For instance, the *PE* for mEos3.2 is known to be 42%. [S2] The concentration of protein subunits, indicative of the detected locations, is directly obtained from experimental outcomes, ensuring an accurate basis for analysis.

To deduce the oligomeric states of proteins, we developed the theoretical model (*PND*theo) based on the experimental setup. [S1] The model incorporates crucial parameters, including protein concentrations, dye photo-activation efficiency, and the radius of the region of interest, to ensure alignment with actual experimental conditions. Stochastic detections in single-molecule imaging were modeled using binomial and Poisson distributions. Using a residue square-based algorithm to match *PND*theo with *PND*exp, this method effectively identifies the subpopulations of monomers, dimers, and trimers with a typical error of 10% across various test conditions.

***Revealing oligomeric state changes through weighted average subunit number ()***

With the fitted results of smND, we calculated the weighted average subunit number (), an effective metric for evaluating the oligomeric state composition of protein complexes. The is calculated using , where represents the percentage of each oligomeric state (*O*g). *O*g represents the corresponding weighting factor which are 1, 2 and 3 for monomer, dimer and trimer, respectively. For example, a hypothetical protein mixture consisting of 90% of the subunits in monomers and 10% of the subunits in dimers would yield an of 1.1 (0.9 × 1 + 0.1 × 2), whereas a mixture with an equal distribution of monomers and dimers (50% each) would yield an of 1.5 (0.5 × 1 + 0.5 × 2). This method reveals that a higher dimer population results in a larger , providing a comprehensive assessment of the sample's averaged oligomeric distribution.

To validate as a robust parameter for experimental delineation of the sample's averaged oligomeric distribution, we compared proteins with known oligomeric populations. We fused the Interleukin-2 receptor (Tac-antigen) with either single (TacmE) or double copies (Tac2mE) of mEos4b. These constructs were expressed on the plasma membrane, serving as membrane-anchored protein controls. Due to the dimeric nature of Tac-antigen, Tac-fusion proteins exist in a monomer-dimer equilibrium in cells. [S3] Therefore, TacmE represents a mixture of mEos4b monomers and dimers, while Tac2mE represents a mixture of mEos4b dimers and tetramers on the plasma membrane, even though both share the same Tac monomer and dimer populations.

Non-reduced immunoblotting was first used to determine the oligomeric population of TacmE and Tac2mE. The results showed that TacmE exists as 59% monomers and 41% dimers, similar to Tac2mE (53% monomers and 47% dimers, Extended Data Fig. 4a,b). These populations thus give values of 1.41 for TacmE and 2.94 for Tac2mE (Extended Data Fig 4c).

When fitting the *PND*exp of TacmE SMLM images with the smND model, it resulted in approximately 48.9% of monomers (Extended Data Fig. 4b) and yielded values of 1.52 (Extended Data Fig. 4c). Similarly, Tac2mE gave about 54.9% monomers and yielded the value of 2.93, which closely matched the immunoblotting results. The close agreement between values derived from immunoblotting and smND for both TacmE and Tac2mE confirms that is a reliable parameter for delineating the averaged protein oligomeric distribution. The consistency in Tac monomer and dimer populations extracted using smND further underscores the method's reliability in revealing changes in oligomeric state.

To ensure that the observed changes in CTR1's oligomeric state are due to CTR1's response and not an effect on the mE tag itself, we performed smND analysis on TacmE under both basal and Cu-treated conditions. Both *TNPD* and *ND* results showed no differences between the two conditions (Extended Data Fig. 4d). The extracted dimer populations and value of TacmE also remained statistically unchanged (Extended Data Fig. 4e), indicating that the oligomeric state of the mE tag is not affected by Cu treatment.

***Challenges and insights when expanding smND analysis to trimeric proteins***

Following the success of using the smND and to analyze proteins existing in two oligomeric states (monomers and dimers for TacmE and dimers and tetramers for Tac2mE), we sought to extend our approach to proteins with trimer configurations. To empirically test the smND assay's effectiveness in discerning trimer populations, we used simulated ground truth data representing proteins in four distinct oligomeric combinations (Com-1 to Com-4, Supplementary Table 2), designed to mimic single-molecule localizations of trimeric proteins existing in various monomer, dimer, and trimer populations. This simulation was crafted to control inputs such as *PE* and detected locations within predefined ROIs, thereby establishing a controlled environment for accurately predicting protein oligomer distributions. Com-1 and Com-2 represent scenarios where proteins transition from trimers into a mixture of monomers and dimers, while Com-3 and Com-4 depict de-trimerization primarily into monomers.

We consider a protein system with a total of *s* subunits. These subunits can interact to form dimers or trimers, resulting in a mixture of monomers, dimers, and trimers within the system. A monomer consists of a single subunit, a dimer consists of two subunits, and a trimer consists of three subunits. To determine the relative subpopulations of the protein system in each form, we calculate the percentage of subunits in each form. This is done by dividing the number of subunits in a particular form by the total number of subunits (*s*) and then multiplying by 100. For example, if there are 40 subunits in monomeric form in a system with 100 total subunits, the percentage of monomers would be (40/100) × 100% = 40%. Similarly, if there are 30 subunits in dimeric form, the percentage of dimers would be (30/100) × 100% = 30%. Finally, if there are 30 subunits in trimeric form, the percentage of trimers would be (30/100) × 100% = 30%. This method allows us to quantify the proportion of the protein system that exists as monomers (%M), dimers (%D), and trimers (%T), providing a clear picture of the oligomeric state distribution within the system.

The smND assay, applied to Com-1 and Com-2, demonstrated good accuracy (~6% deviations of trimer populations from ground true values to estimated values) when extracting oligomeric subpopulations (Supplementary Table 2, no kinetic model). However, the fitting process generated several *PND*theo profiles with closely matched residual squares, indicating a larger variation in each oligomeric population. For example, for Com-3, 28 *PND*theo profiles of subunits distributed in monomer, dimer, and trimer (%M, %D, %T) were identified ranging from (15%, 45%, 40%) to (35%, 5%, 60%), giving a consolidated population of (22%, 22%, 56%). Similar situations were observed in the Com-4 analysis, whose consolidated population is (52%, 23%, 25%). The deviations in trimer subpopulations (Δ%T) increased from 6% to ~15% when comparing conditions involving dimers (Com-1 and Com-2) to those without (Com-3 and Com-4). Despite these discrepancies in subpopulation estimates, the calculations remained consistent with the simulated inputs across all conditions. For example, despite discrepancies in subpopulation estimates in Com-3 and Com-4, where dimer populations were theoretically zero, the still provided a robust average of the oligomeric states. This was evident in the Com-3 and Com-4 results, where the was calculated as 2.34 and 1.73, closely aligning with the ground truth data of 2.40 and 1.80, respectively.

These results reveal several insights: (1) Population estimation variability: when comparing weighted populations extracted from smND to the ground truth data, particularly in cases where dimer populations were set to 0% (Com-3 and Com-4), discrepancies of ~15% were observed in the trimer percentage, indicating that a blend of monomer and trimer could be erroneously interpreted as dimers. (2) Robustness of : despite the larger error in the extracted subpopulations from smND, the subsequent recalculations of still robustly reports the averaged protein oligomeric states. (3) Analytical refinement needed: while being a promising parameter to reflect the averaged protein oligomeric state, quantification of oligomer stoichiometry necessitates further analytical refinement.

***Extracting upper and lower boundaries of oligomeric subpopulations using smND analysis with dissociation models***

To further enhance the precision of smND assay in quantifying the subpopulations of trimeric proteins, we integrated kinetic models that account for trimer dissociation dynamics. We consider a protein system that can exist in trimeric, dimeric, and monomeric forms (Fig. 2f). In this system, a trimer can dissociate into a monomer and a dimer with an equilibrium constant *K*1, and a dimer can further dissociate into two monomers with an equilibrium constant *K*2. These constants represent distinct stages of trimer dissociation, essential for understanding the full scope of oligomeric state transitions under physiological conditions, crucial for establishing the boundaries for accurate subpopulation determinations.

Model 1 (T 🡪 M + D) assumes the initial dissociation of a trimer into a monomer and a dimer, with no further dissociation of the dimer (*K*2 🡪 0). This model simplifies the population to three components: monomers, dimers, and trimers. The condition that the percentages of each component sum to 100% (%M + %D + %T = 100%) holds, with the additional constraint that the dissociation of trimers produces equal number of monomers and dimers. For example, with a system containing *s* protein subunits, the dissociation of *x* trimers leads to the formation of *x* monomers and *x* dimers, leading to the subunit population in trimer, dimer, and monomer equal to (*s*-3*x*)/*s*, 2*x*/*s*, and *x*/*s*, respectively. This fixed subunit ratio provides a stable framework for our *PND*theo fitting and offers interpretable results reflecting physical dissociation processes.

Model 2 (T 🡪 3M) considers a scenario where dimers dissociate into two monomers due to *K*2 🡪 infinity. This model eliminates dimers from the population, directly correlating trimer decay with monomer formation. Here, the dissolution of each trimer results in three monomers, simplifying the population to a direct relationship between trimers and monomers populations equal to (*s*-3*x*)/*s* and 3*x*/*s*.

The implementation of these models was tested against simulated data representing different trimeric subpopulations (Supplementary Table 2, Com-1 to Com-4). When applying Model 1 to Com-1 and Com-2, which were designed to reflect a balance between all three oligomeric states, the smND analysis accurately quantified the corresponding subpopulations (Supplementary Table 2, Model 1). However, significant challenges arose when this model was used to fit scenarios like Com-3 and Com-4, where direct de-trimerization to monomers was predominant (Supplementary Table 2, Model 1, Δ%T). These cases showed notable underestimations of the trimer populations, particularly as the proportion of trimers decreased. This misclassification of some trimers as dimers underscores the critical role of accurately calibrating the dissociation rates to reflect experimental conditions and sets a lower boundary for trimer population estimates. Conversely, applying Model 2 to Com-1 and Com-2 resulted in overestimations of the trimer populations (Supplementary Table 2, Model 2, Δ%T). This overestimation arose because the absence of dimers in the model led to an incorrect assumption that all non-monomeric species were trimers, thus providing an upper boundary for trimer estimates.

Incorporating Model 1 and Model 2 into our smND analysis established a definitive range for CTR1's trimeric population under two distinct dissociation scenarios. The T 🡪 M + D model represents no such second-stage dissociation occurs, while the T 🡪 3M model delineates a scenario of rapid second-stage dissociation from dimers. Although details of CTR1's dissociation mechanism remain elusive, this approach confidently places the actual trimeric population of CTR1 within this specified range. Therefore, by applying these precise kinetic models to our smND framework, we effectively track variations in CTR1's trimer population across different copper stress conditions, offering a robust method for observing changes in oligomeric states.

**Supplemental references**

S1. Chen, H., and Chen, T.-Y. (2023). From Monomers to Hexamers: A Theoretical Probability of the Neighbor Density Approach to Dissect Protein Oligomerization in Cells. Anal. Chem. https://doi.org/10.1021/acs.analchem.3c04728.

S2. Durisic, N., Laparra-Cuervo, L., Sandoval-Álvarez, Á., Borbely, J.S., and Lakadamyali, M. (2014). Single-molecule evaluation of fluorescent protein photoactivation efficiency using an in vivo nanotemplate. Nat. Methods *11*, 156–162. https://doi.org/10.1038/nmeth.2784.

S3. Kato, K., and Smith, K.A. (1987). Tac antigen forms disulfide-linked homodimers. Biochemistry *26*, 5359–5364. https://doi.org/doi.org/10.1021/bi00391a021.
